# Supplementary material for: Office-Based Methadone Treatment for Opioid Use Disorder and Pharmacy Dispensing: A Scoping Review
Source: Atypon-hosted journal article supplement (doi:10.1176/appi.ajp.2021.20101548), 2021-07-28
Supplement: appi.ajp.2021.20101548.ds001.pdf [file appi.ajp.2021.20101548.ds001.pdf]

## **Supplement Table S1**

### **Search Strategies (used for the total evidence review)**

#### **Systematic Reviews**

Database: Ovid MEDLINE(R) ALL 1946 to July 30, 2020

1 Methadone/ad, ae, tu, to

2 methadone.ti,ab,kf.

3 1 or 2

4 (systematic or medline or "meta analysis" or "metaanalysis").ti,ab,kf,sh.

5 3 and 4

6 limit 3 to (meta analysis or "systematic review" or systematic reviews as topic)

7 5 or 6

Database: EBM Reviews - Cochrane Database of Systematic Reviews 2005 to July 15, 2020

1 (methadone or "opioid agonist\*").ti.

2 (methadone or "opioid agonist\*" or "opioid use disorder").ti.

3 (methadone or "opioid agonist\*" or "opioid use disorder").ti,ab.

#### **Policy**

Database: Ovid MEDLINE(R) ALL 1946 to July 30, 2020

1 Methadone/

2 Heroin/ or Morphine/

3 (methadone or heroin or morphine).ti,ab,kf.

4 "opioid agonist\*".ti,ab,kf.

5 Policy Making/

6 Health Policy/

7 Public Policy/

8 exp Legislation, Drug/

9 Legislation, Medical/

10 ((government or national or federal or state\* or local) and (policy or policies or regulation or regulations or rules)).ti,ab,kf.

11 (law or laws or legislation or legislative).ti,ab,kf.

12 or/1-4

13 or/5-11

14 12 and 13

15 limit 14 to english language

16 (animal\* or mouse or mice or rat\* or dog\* or canine or cow\* or bovine or horse\* or mare\* or pig\* or porcine or rabbit\* or llama\* or sheep or ewe\*).ti.

17 15 not 16

18 ("primary care" and (prescrib\* or dispens\*)).ti,ab,kf.

19 (dihydromorphine or levomethadone).ti,ab,kf.

20 ((hospital\* or "emergency department" or "ED") and (initiate\* or initiation)).ti,ab,kf.

21 "interim methadone".ti,ab,kf.

22 ("COVID 19" or "sars cov 2").ti,ab,kf.

23 ((adolescen\* or teen\*) and (policy or policies or regulation or regulations or rules)).ti,ab,kf.

24 "take home".ti,ab,kf.

25 ("prior authorization" or ((dose or dosing or duration) and limit\*)) and (policy or policies or regulation or regulations or rules)).ti,ab,kf.

26 "models of care".ti,ab,kf.

27 (van or vans).ti,ab,kf.

28 Prisons/

29 Prisoners/

30 (jail or jails or "criminal justice" or incarcerate\* or prison\*).ti,ab,kf.

31 exp Credentialing/

32 accreditation.ti,ab,kf.

33 (pharmacy or pharmacist).sh

34 or/18-33

35 12 and 34

36 limit 35 to english language

37 17 or 36
